# Supplementary material for: Microgeographic genomic variation and connectivity in an endangered semiaquatic mammal
Source: Research Square preprint supplement (doi:10.21203/rs.3.rs-7018148/v1), 2025-07-17
Supplement: Supplementary file 1 [file bef7a32613fb52081dc3e5df.pdf]

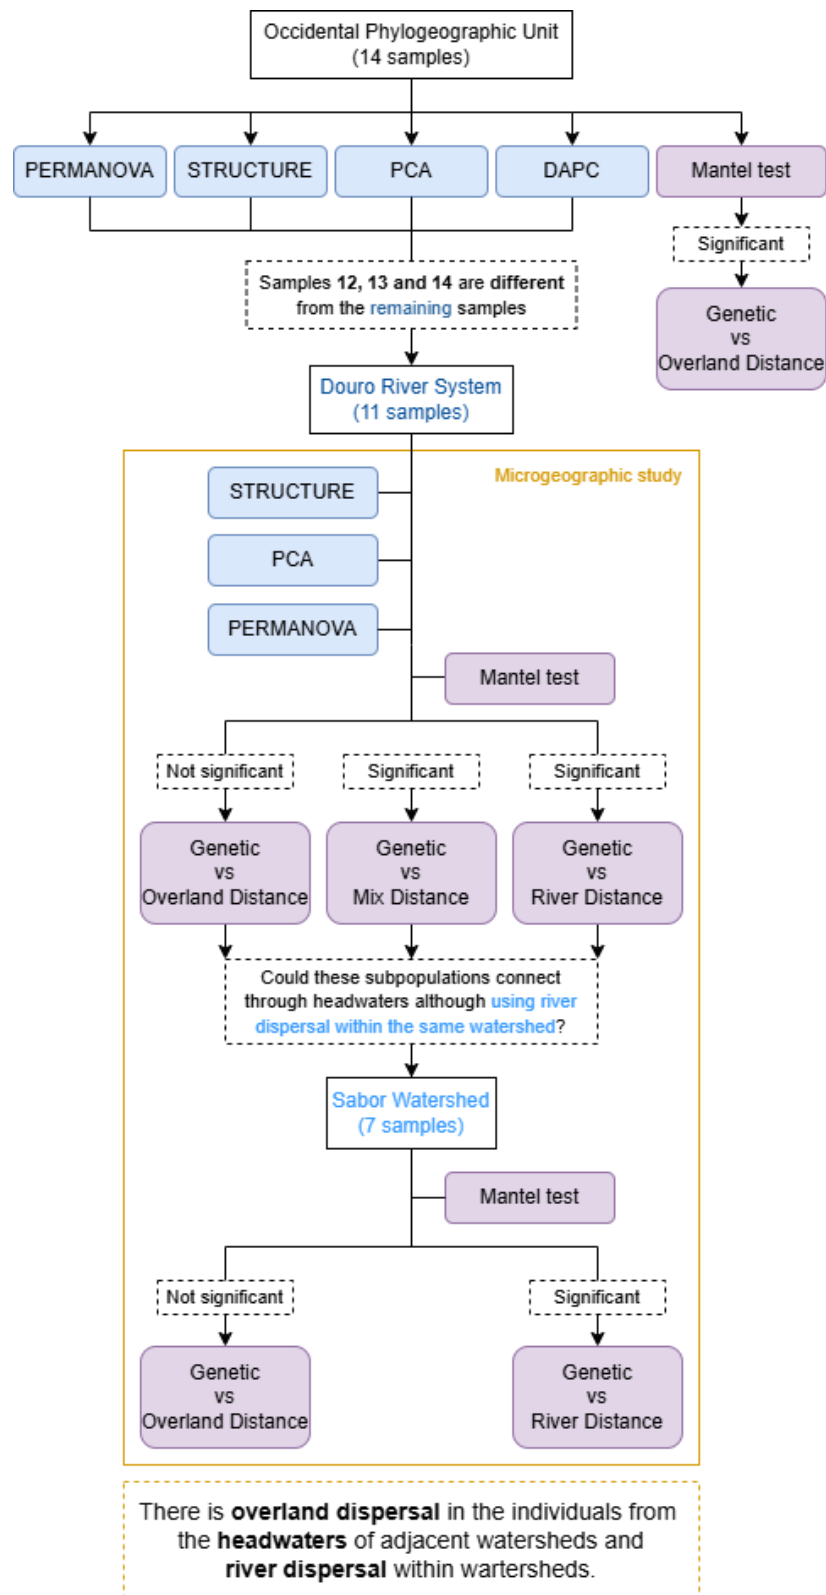

**Fig. S1:** Diagram showing the flow of analyses for this manuscript.

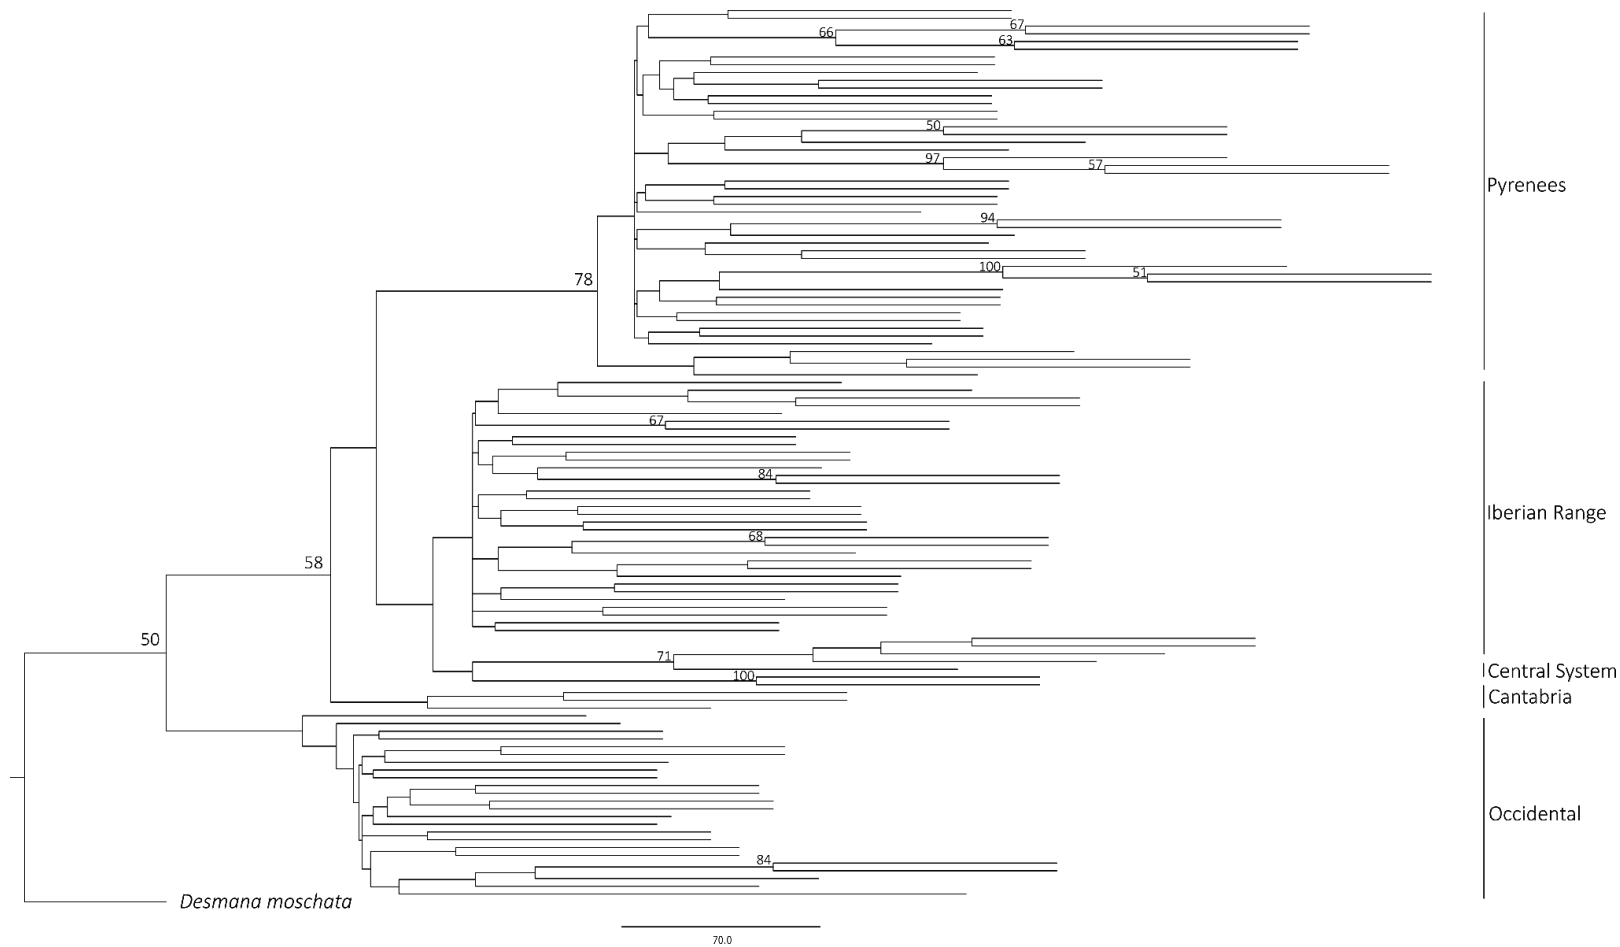

**Fig. S2:** Neighbour-joining tree based on the 115 samples and 110 SNPs using PHYLIP with 100 bootstraps and the Russian desman (*Desmana moschata*) as outgroup. Bootstrap values from 100 replicates are displayed for nodes with support  $\geq 50\%$ . The five phylogeographic units are highlighted.

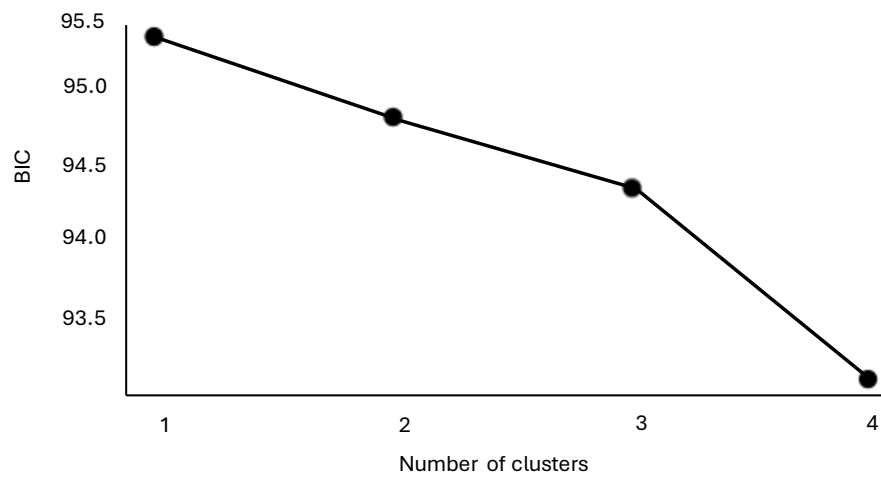

**Fig. S3:** Bayesian Information Criterion (BIC) values for each number of clusters for the Discriminant Analysis of Principal Components analysis taking 6 principal components into account for the samples from the Occidental population, based on 7,604 SNPs.

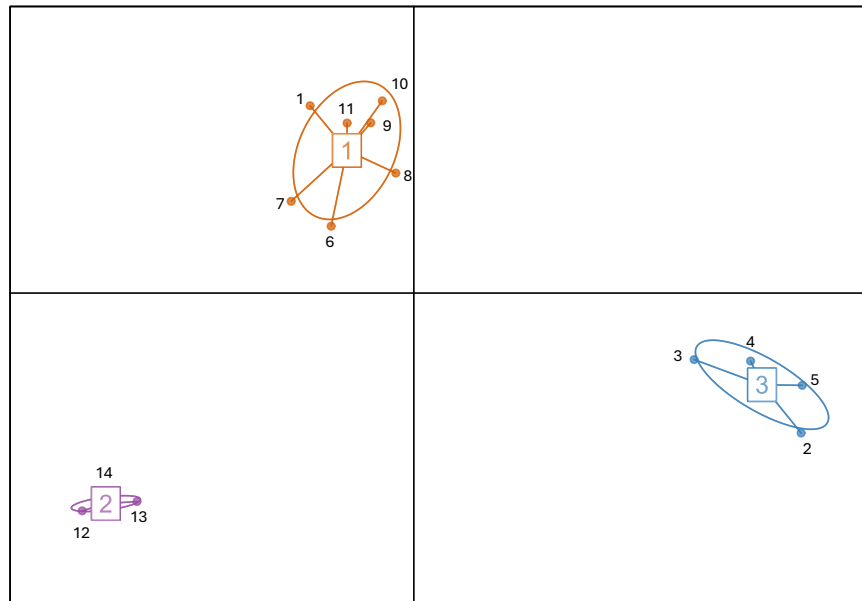

**Fig. S4:** Discriminant Analysis of Principal Components for the Occidental phylogeographic unit, with 6 principal components and based on 7,604 SNPs, showing 3 clusters.

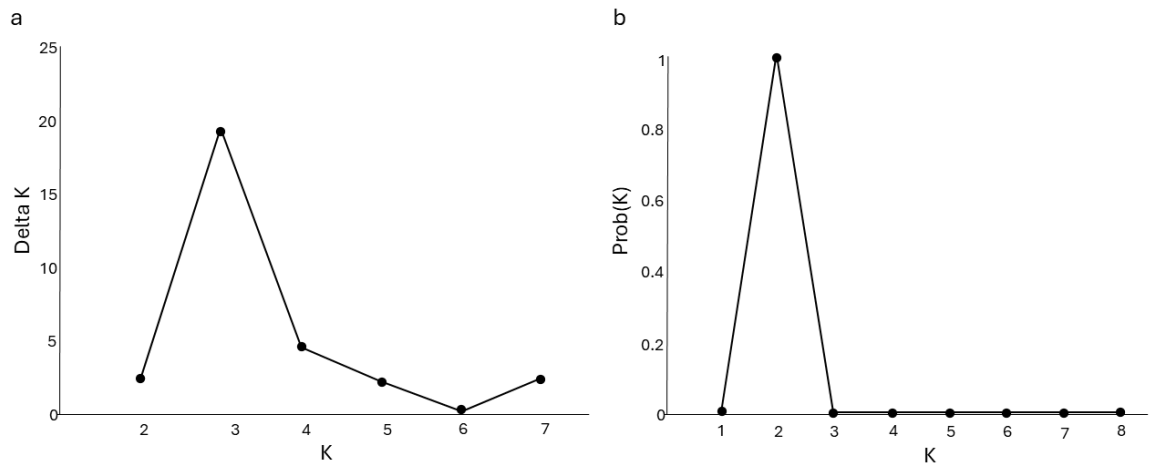

**Fig. S5:** STRUCTURE analyses for the Occidental phylogeographic unit, based on 7,604 SNPs: **a.** the rate of change in the likelihood of the data as K increases (Delta K) by Evanno et al. [1]; **b.** the probability or likelihood of the data for each K (Prob(K)) based on the Bayesian clustering algorithm by Pritchard et al. [2].

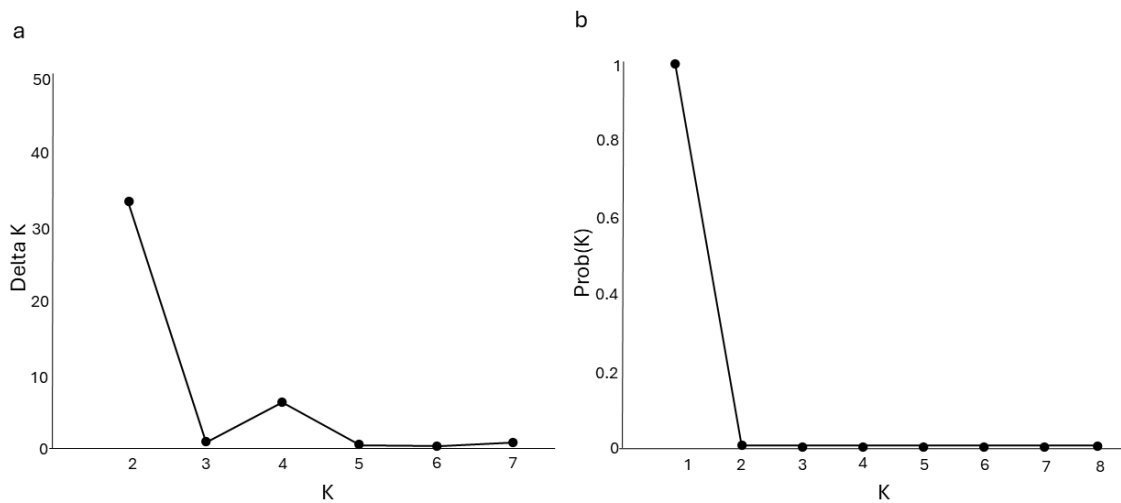

**Fig. S6:** STRUCTURE analyses for the Douro river system, based on 8,771 SNPs: **a.** the rate of change in the likelihood of the data as K increases (Delta K) by Evanno et al. [1]; **b.** the probability or likelihood of the data for each K (Prob(K)) based on the Bayesian clustering algorithm by Pritchard et al. [2].

## References

1. Evanno G, Regnaut S, Goudet J. Detecting the number of clusters of individuals using the software STRUCTURE: a simulation study. *Mol Ecol*. 2005;14:2611-20.
2. Pritchard JK, Stephens M, Donnelly P. Inference of population structure using multilocus genotype data. *Genetics*. 2000;155:945–59.
